# Supplementary material for: Preoperative Function Assessment of Ex Vivo Kidneys with Supervised Machine Learning Based on Blood and Urine Markers Measured during Normothermic Machine Perfusion
Source: MDPI journal article supplement (doi:10.3390/biomedicines10123055), 2022-11-28
Supplement: s1 [file s1]

# Supplementary Material – S1

## Characteristics of all kidneys

**Table S1.** Overview of kidneys preserved ex vivo with normothermic machine perfusion (NMP). Listed are the sex, race, warm ischemia time, cold ischemia time, glomerular filtration rate (GFR) and inulin eliminated from the blood during NMP ( $I_{e,total}$ ) for all kidneys of a class, kidneys in the training and validation data set, and kidneys in the test data set. Data are presented as mean  $\pm$  standard deviation. Previously published in [24].

| <b>Pig and Kidney Characteristics</b> | <b>Class 1</b> | <b>Class 2</b> | <b>Class 3</b>  |
|---------------------------------------|----------------|----------------|-----------------|
| <i><u>Overall</u></i>                 | <i>n</i> = 4   | <i>n</i> = 10  | <i>n</i> = 12   |
| Female:Male                           | 3:1            | 4:6            | 4:8             |
| German Landrace:Swabian Hall          | 3:1            | 4:6            | 4:8             |
| Warm ischemia time in min             | 122 $\pm$ 52   | 67 $\pm$ 30    | 12 $\pm$ 7      |
| Cold ischemia time in min             | 404 $\pm$ 246  | 402 $\pm$ 201  | 312 $\pm$ 170   |
| GFR in mL/min/100 g                   | 1.3 $\pm$ 0.6  | 3.0 $\pm$ 0.9  | 14.8 $\pm$ 10.1 |
| $I_{e,total}$ in %                    | 45 $\pm$ 1     | 72 $\pm$ 9     | 97 $\pm$ 3      |
| <i><u>Training and validation</u></i> | <i>n</i> = 3   | <i>n</i> = 8   | <i>n</i> = 9    |
| Female:Male                           | 2:1            | 3:5            | 2:7             |
| German Landrace:Swabian Hall          | 2:1            | 3:5            | 2:7             |
| Warm ischemia time in min             | 114 $\pm$ 61   | 66 $\pm$ 34    | 12 $\pm$ 7      |
| Cold ischemia time in min             | 341 $\pm$ 259  | 397 $\pm$ 233  | 305 $\pm$ 125   |
| GFR in mL/min/100 g                   | 1.5 $\pm$ 0.8  | 2.9 $\pm$ 0.8  | 16.4 $\pm$ 10.4 |
| $I_{e,total}$ in %                    | 45 $\pm$ 1     | 72 $\pm$ 9     | 97 $\pm$ 3      |
| <i><u>Test</u></i>                    | <i>n</i> = 1   | <i>n</i> = 2   | <i>n</i> = 3    |
| Female:Male                           | 1:0            | 1:1            | 2:1             |
| German Landrace:Swabian Hall          | 1:0            | 1:1            | 2:1             |
| Warm ischemia time in min             | 145            | 73 $\pm$ 10    | 13 $\pm$ 8      |
| Cold ischemia time in min             | 594            | 420 $\pm$ 121  | 333 $\pm$ 309   |
| GFR in mL/min/100 g                   | 0.8            | 3.4 $\pm$ 1.4  | 10.0 $\pm$ 9.3  |
| $I_{e,total}$ in %                    | 44             | 75 $\pm$ 12    | 98 $\pm$ 1      |

[24] Sommer, F.; Sun, B.; Fischer, J.; Goldammer, M.; Thiele, C.; Malberg, H.; Markgraf, W. Hyperspectral Imaging during Normothermic Machine Perfusion-A Functional Classification of Ex Vivo Kidneys Based on Convolutional Neural Networks. *Biomedicines* 2022, 10(2), 397. <https://doi.org/10.3390/biomedicines10020397>. This article is an open access article distributed under the terms and conditions of the Creative Commons Attribution (CC BY) license (<https://creativecommons.org/licenses/by/4.0/>).
