# Supplementary material for: Preoperative Function Assessment of Ex Vivo Kidneys with Supervised Machine Learning Based on Blood and Urine Markers Measured during Normothermic Machine Perfusion
Source: MDPI journal article supplement (doi:10.3390/biomedicines10123055), 2022-11-28
Supplement: s1 [file s1]

## Supplementary Material – Table S2

### Testing for multicollinearity

**Table S2.** Detection of multicollinearity using VIF. First, all 11 markers were tested for multicollinearity ( $VIF_{total}$ ). Due to critical correlation ( $VIF > 10$ ), two markers were excluded. The remaining 9 markers were retested for multicollinearity ( $VIF_{reduced}$ ).

| Marker                      | $VIF_{total}$ | $VIF_{reduced}$ |                   |
|-----------------------------|---------------|-----------------|-------------------|
| RBF                         | 6.2           | 2.7             | VIF = 1           |
| AP                          | 8.1           | 1.7             | $1 < VIF \leq 5$  |
| T <sub>Kidney</sub>         | 1.7           | 1.2             | $5 < VIF \leq 10$ |
| IRR                         | 13.6          | X               | VIF > 10          |
| VO <sub>2</sub>             | 15.3          | 1.8             |                   |
| DO <sub>2</sub>             | 22.0          | X               |                   |
| ERO <sub>2</sub>            | 1.1           | 1.2             |                   |
| CO <sub>2</sub> P           | 1.1           | 1.0             |                   |
| Urine production            | 2.5           | 2.3             |                   |
| Relative urea concentration | 2.2           | 2.1             |                   |
| Relative GST activity       | 1.1           | 1.1             |                   |
