# Supplementary material for: Preoperative Function Assessment of Ex Vivo Kidneys with Supervised Machine Learning Based on Blood and Urine Markers Measured during Normothermic Machine Perfusion
Source: MDPI journal article supplement (doi:10.3390/biomedicines10123055), 2022-11-28
Supplement: s1 [file s1]

# Supplementary Material – Table S5/ Figure S1

## Classification based on the preoperative Remuzzi score

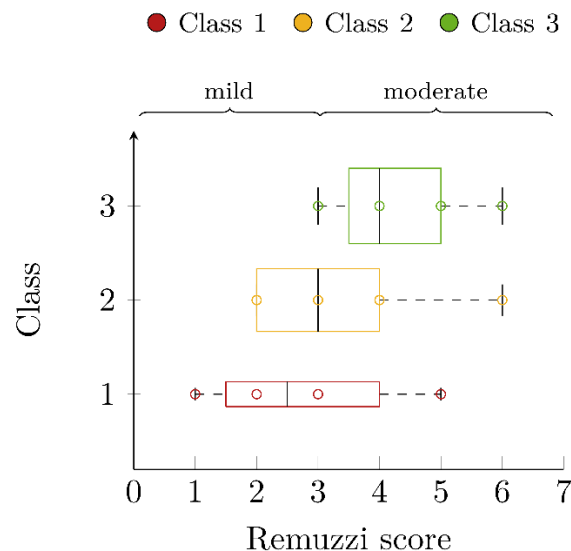

**Figure S1.** Results of histological findings. The correlation of functional class with Remuzzi score is shown. n = 4 for nonfunctional kidneys (class 1), n = 10 for kidneys with limited function (class 2), n = 12 for functional kidneys (class 3).

## Classification based on the tubular atrophy

**Table S5:** Results of the histological findings with regard to the acute damage. The relation between functional class and tubular atrophy, a parameter of the Remuzzi Score, is shown. Histologic findings demonstrated tubular atrophy values of 0, 1+, 2+, but never 3+. n = 4 for nonfunctional kidneys (class 1), n = 10 for kidneys with limited function (class 2), n = 12 for functional kidneys (class 3).

| Class | Evaluation of tubular atrophy according to Remuzzi [4] |    |    |
|-------|--------------------------------------------------------|----|----|
|       | 0                                                      | 1+ | 2+ |
| 1     | 2                                                      | 2  | 0  |
| 2     | 4                                                      | 5  | 1  |
| 3     | 1                                                      | 7  | 4  |

[4] Remuzzi, G.; Grinyò, J.; Ruggerenti, P.; Beatini, M.; Cole, E.H.; Milford, E.L.; Brenner, B.M. Early experience with dual kidney transplantation in adults using expanded donor criteria. *JASN* **1999**, *10*, 2591–2598. <https://doi.org/10.1681/ASN.V10122591>.
