# Supplementary material for: Preoperative Function Assessment of Ex Vivo Kidneys with Supervised Machine Learning Based on Blood and Urine Markers Measured during Normothermic Machine Perfusion
Source: Biomedicines. 2022 Nov 28;10(12):3055. doi: 10.3390/biomedicines10123055 (PMC9776285; doi:10.3390/biomedicines10123055)
Supplement: Supplementary file 1 [file biomedicines-10-03055-s001.zip]

Archive with 4 entries (4 files):
- Supplement_Digital_Material_Table_S1.pdf
- Supplement_Digital_Material_Table_S2.pdf
- Supplement_Digital_Material_Table_S3_S4.pdf
- Supplement_Digital_Material_Table_S5_Figure_S1.pdf
